# Supplementary material
Source: HighWire-hosted journal article supplement (https://bmjopen.bmj.com/content/10/6/e033493)
Supplement: inline-supplementary-material-1 [file inline-supplementary-material-1.pdf]

**Supplement table 1** Unadjusted relative use of hospital for patients who died of heart failure or COPD when compared with patients with cancer

| Hospital admissions                                       | Died of cancer   | Died of heart failure | Died of COPD      |
|-----------------------------------------------------------|------------------|-----------------------|-------------------|
| Relative total bed day use (95% CI)                       |                  |                       |                   |
| Six months before death                                   | 1.00 (reference) | 0.37 (0.36; 0.39)     | 0.50 (0.49; 0.51) |
| 30 days before death                                      | 1.00             | 0.40 (0.38; 0.42)     | 0.57 (0.55; 0.58) |
| Relative number of hospital admissions (95% CI)           |                  |                       |                   |
| Six months before death                                   | 1.00             | 0.50 (0.49; 0.51)     | 0.63 (0.62; 0.64) |
| 30 days before death                                      | 1.00             | 0.59 (0.58; 0.61)     | 0.78 (0.76; 0.79) |
| Relative length of stay per hospital admission (95% CI)   |                  |                       |                   |
| Six months before death                                   | 1.00             | 1.31 (1.27; 1.35)     | 1.34 (1.32; 1.37) |
| 30 days before death                                      | 1.00             | 0.85 (0.82; 0.89)     | 0.90 (0.87; 0.92) |
| Prevalence proportion ratio of in-hospital death (95% CI) | 1.00             | 1.24 (1.21; 1.28)     | 1.15 (1.13; 1.17) |

**Supplement table 2** Adjusted relative use of hospital for patients who died of heart failure or COPD when compared with patients with cancer, stratified by calendar year of death

| Hospital admissions                             | 2006              | 2007              | 2008              | 2009              | 2010              | 2011              | 2012              | 2013              | 2014              | 2015              |
|-------------------------------------------------|-------------------|-------------------|-------------------|-------------------|-------------------|-------------------|-------------------|-------------------|-------------------|-------------------|
| Relative total bed day use                      |                   |                   |                   |                   |                   |                   |                   |                   |                   |                   |
| (95% CI)                                        |                   |                   |                   |                   |                   |                   |                   |                   |                   |                   |
| Six months before death                         |                   |                   |                   |                   |                   |                   |                   |                   |                   |                   |
| Died of cancer                                  | 1.00              | 1.00              | 1.00              | 1.00              | 1.00              | 1.00              | 1.00              | 1.00              | 1.00              | 1.00              |
| Died of heart failure                           | 0.60 (0.55; 0.65) | 0.56 (0.51; 0.61) | 0.63 (0.57; 0.69) | 0.67 (0.62; 0.74) | 0.66 (0.60; 0.72) | 0.69 (0.63; 0.76) | 0.58 (0.53; 0.64) | 0.69 (0.62; 0.76) | 0.71 (0.64; 0.78) | 0.73 (0.66; 0.81) |
| Died of COPD                                    | 0.65 (0.61; 0.69) | 0.52 (0.58; 0.66) | 0.63 (0.59; 0.67) | 0.69 (0.65; 0.73) | 0.69 (0.65; 0.73) | 0.69 (0.64; 0.73) | 0.70 (0.66; 0.74) | 0.71 (0.67; 0.75) | 0.72 (0.68; 0.77) | 0.72 (0.67; 0.77) |
| 30 days before death                            |                   |                   |                   |                   |                   |                   |                   |                   |                   |                   |
| Died of cancer                                  | 1.00              | 1.00              | 1.00              | 1.00              | 1.00              | 1.00              | 1.00              | 1.00              | 1.00              | 1.00              |
| Died of heart failure                           | 0.62 (0.55; 0.71) | 0.62 (0.55; 0.70) | 0.63 (0.56; 0.71) | 0.72 (0.64; 0.81) | 0.67 (0.59; 0.75) | 0.75 (0.67; 0.84) | 0.54 (0.47; 0.61) | 0.64 (0.57; 0.72) | 0.67 (0.59; 0.77) | 0.71 (0.63; 0.80) |
| Died of COPD                                    | 0.64 (0.59; 0.70) | 0.69 (0.64; 0.76) | 0.67 (0.61; 0.73) | 0.71 (0.66; 0.77) | 0.68 (0.63; 0.74) | 0.74 (0.68; 0.79) | 0.67 (0.62; 0.73) | 0.69 (0.64; 0.75) | 0.77 (0.65; 0.76) | 0.75 (0.70; 0.82) |
| Relative number of hospital admissions (95% CI) |                   |                   |                   |                   |                   |                   |                   |                   |                   |                   |
| Six months before death                         |                   |                   |                   |                   |                   |                   |                   |                   |                   |                   |
| Died of cancer                                  | 1.00              | 1.00              | 1.00              | 1.00              | 1.00              | 1.00              | 1.00              | 1.00              | 1.00              | 1.00              |
| Died of heart failure                           | 0.81 (0.77; 0.85) | 0.83 (0.80; 0.87) | 0.83 (0.80; 0.87) | 0.83 (0.79; 0.87) | 0.83 (0.79; 0.87) | 0.82 (0.78; 0.86) | 0.85 (0.81; 0.90) | 0.88 (0.83; 0.92) | 0.86 (0.82; 0.90) | 0.85 (0.81; 0.90) |
| Died of COPD                                    | 0.83 (0.80; 0.86) | 0.81 (0.78; 0.83) | 0.81 (0.78; 0.84) | 0.85 (0.82; 0.87) | 0.86 (0.83; 0.89) | 0.84 (0.82; 0.87) | 0.87 (0.84; 0.90) | 0.86 (0.83; 0.89) | 0.86 (0.83; 0.89) | 0.89 (0.86; 0.92) |
| 30 days before death                            |                   |                   |                   |                   |                   |                   |                   |                   |                   |                   |
| Died of cancer                                  | 1.00              | 1.00              | 1.00              | 1.00              | 1.00              | 1.00              | 1.00              | 1.00              | 1.00              | 1.00              |
| Died of heart failure                           | 0.95 (0.93; 0.98) | 0.96 (0.93; 0.99) | 0.94 (0.91; 0.97) | 0.94 (0.91; 0.97) | 0.95 (0.92; 0.98) | 0.97 (0.94; 1.00) | 0.96 (0.93; 0.99) | 0.96 (0.92; 0.99) | 0.95 (0.92; 0.98) | 0.96 (0.93; 0.99) |
| Died of COPD                                    | 0.95 (0.93; 0.97) | 0.93 (0.91; 0.95) | 0.95 (0.93; 0.97) | 0.95 (0.93; 0.97) | 0.95 (0.93; 0.97) | 0.96 (0.94; 0.98) | 0.96 (0.94; 0.98) | 0.97 (0.95; 0.99) | 0.95 (0.93; 0.97) | 0.97 (0.95; 0.99) |

|                                                           |                   |                   |                   |                   |                   |                   |                   |                   |                   |                   |
|-----------------------------------------------------------|-------------------|-------------------|-------------------|-------------------|-------------------|-------------------|-------------------|-------------------|-------------------|-------------------|
| Relative length of stay per hospital admission (95% CI)   |                   |                   |                   |                   |                   |                   |                   |                   |                   |                   |
| Six months before death                                   |                   |                   |                   |                   |                   |                   |                   |                   |                   |                   |
| Died of cancer                                            | 1.00              | 1.00              | 1.00              | 1.00              | 1.00              | 1.00              | 1.00              | 1.00              | 1.00              | 1.00              |
| Died of heart failure                                     | 1.04 (0.95; 1.14) | 0.98 (0.90; 1.07) | 1.09 (1.00; 1.19) | 1.12 (1.03; 1.22) | 1.08 (0.99; 1.19) | 1.14 (1.04; 1.25) | 0.98 (0.90; 1.08) | 1.04 (0.95; 1.14) | 1.07 (0.97; 1.17) | 1.11 (1.02; 1.21) |
| Died of COPD                                              | 1.19 (1.12; 1.27) | 1.19 (1.12; 1.27) | 1.12 (1.05; 1.19) | 1.17 (1.11; 1.24) | 1.13 (1.07; 1.20) | 1.20 (1.14; 1.28) | 1.18 (1.11; 1.25) | 1.13 (1.07; 1.20) | 1.15 (1.08; 1.21) | 1.14 (1.08; 1.21) |
| 30 days before death                                      |                   |                   |                   |                   |                   |                   |                   |                   |                   |                   |
| Died of cancer                                            | 1.00              | 1.00              | 1.00              | 1.00              | 1.00              | 1.00              | 1.00              | 1.00              | 1.00              | 1.00              |
| Died of heart failure                                     | 0.72 (0.64; 0.82) | 0.72 (0.64; 0.82) | 0.75 (0.66; 0.85) | 0.82 (0.72; 0.92) | 0.76 (0.67; 0.87) | 0.83 (0.73; 0.94) | 0.61 (0.54; 0.69) | 0.73 (0.64; 0.83) | 0.77 (0.67; 0.88) | 0.81 (0.71; 0.92) |
| Died of COPD                                              | 0.78 (0.71; 0.85) | 0.87 (0.80; 0.95) | 0.79 (0.72; 0.86) | 0.83 (0.77; 0.90) | 0.79 (0.72; 0.86) | 0.85 (0.78; 0.92) | 0.79 (0.73; 0.85) | 0.81 (0.75; 0.88) | 0.82 (0.76; 0.89) | 0.87 (0.80; 0.94) |
| Prevalence proportion ratio of in-hospital death (95% CI) |                   |                   |                   |                   |                   |                   |                   |                   |                   |                   |
| Died of cancer                                            | 1.00              | 1.00              | 1.00              | 1.00              | 1.00              | 1.00              | 1.00              | 1.00              | 1.00              | 1.00              |
| Died of heart failure                                     | 1.03 (0.94; 1.13) | 0.98 (0.89; 1.07) | 1.04 (0.95; 1.14) | 1.04 (0.95; 1.14) | 1.08 (0.98; 1.19) | 1.17 (1.06; 1.29) | 0.95 (0.86; 1.05) | 0.94 (0.85; 1.05) | 1.01 (0.91; 1.12) | 1.02 (0.93; 1.13) |
| Died of COPD                                              | 0.97 (0.91; 1.04) | 0.93 (0.87; 1.00) | 0.95 (0.89; 1.01) | 0.92 (0.87; 0.98) | 0.97 (0.91; 1.03) | 0.98 (0.92; 1.04) | 0.92 (0.87; 0.98) | 0.95 (0.89; 1.01) | 0.98 (0.92; 1.04) | 0.96 (0.90; 1.02) |
